# Supplementary material for: LHBs can elevate the expression of MDR1 through HIF-1α in patients with CHB infection: a comparative proteomic study
Source: PubMed Central journal article supplement (PMC5354853; doi:10.18632/oncotarget.13941), 2016-12-15
Supplement: oncotarget-08-4549-s001.pdf [file oncotarget-08-4549-s001.pdf]

## LHBs can elevate the expression of MDR1 through HIF-1 $\alpha$ in patients with CHB infection: a comparative proteomic study

### Supplementary Materials

#### Supplementary Table S1: Demographic and clinic characteristics of individuals included in this study

| Group               | Total (n) | Age (year)<br>mean $\pm$ SD | Gender<br>(male/female) | ALT (U/L)<br>(median, range) | HBsAg status (n)<br>(positive/negative) | HBeAg status (n)<br>(positive/negative) | HBV DNA (log copies/ml)<br>(median, range) |
|---------------------|-----------|-----------------------------|-------------------------|------------------------------|-----------------------------------------|-----------------------------------------|--------------------------------------------|
| Healthy controls    | 26        | 29 $\pm$ 14.1               | 19/7                    | 23 (8,51)                    | 0/26                                    | NA                                      | NA                                         |
| Chronic hepatitis B | 102       | 37 $\pm$ 11.4               | 72/30                   | 154 (61,627)                 | 102/0                                   | 56/46                                   | 5.23 (3.12, 8.90)                          |

Abbreviations: ALT, alanine aminotransferase; HBsAg, hepatitis B surface antigen; HBeAg, hepatitis B e antigen; HBV DNA, hepatitis B virus deoxyribose nucleic acid; NA, not applicable.

**Supplementary Table S2: List of DPSs between CHB patients and non-HBV infected individuals by iTRAQ.** See Supplementary\_Table\_S2

**Supplementary Table S3: Partial list of proteins found to be differentially expressed between CHB patients and non-HBV infected individuals by iTRAQ.** See Supplementary\_Table\_S3

**Supplementary Table S4: List of the 345 transcriptional factors detected between pCMV-tag2B-LS and pCMV-tag2B plasmid transfected HepG2 cells.** See Supplementary\_Table\_S4

**Supplementary Table S5: List of differentially expressed transcriptional factors between pCMV-tag2B-LS and pCMV-tag2B plasmid transfected HepG2 cells (at least 5-fold).** See Supplementary\_Table\_S5

**Supplementary Table S6: List of differentially expressed transcriptional factors between pCMV-tag2B-LS and pCMV-tag2B plasmid transfected HepG2 cells (At least 10-fold in up-regulated and 5-fold in down-regulated).** See Supplementary\_Table\_S6

**Supplementary Table S7: List of gene-specific primers used in this study.** See Supplementary\_Table\_S7

**Supplementary Table S8: Primers, length of qRT-PCR products, and restriction enzyme cutting sites of LHBs, MHBs, SHBs and X protein of HBV**

| Protein name                         | Forward primer                               | Reverse primer                                 | Length of PCR product (bp) | Restriction enzyme cutting site   |
|--------------------------------------|----------------------------------------------|------------------------------------------------|----------------------------|-----------------------------------|
| Large surface protein of HBV (LHBs)  | 5'- <u>CTGCAGGGGCAG</u><br>AATCTTTCCACCA-3'  | 5'- <u>AAGCTTTTAAATGT</u><br>ATACCCAAAGACAA-3' | 1,170                      | Pst I: CTGCAG<br>Hand III: AAGCTT |
| Middle surface protein of HBV (MHBs) | 5'- <u>CTGCAGCAGTGG</u><br>AATTCCACAACCT-3'  | 5'- <u>AAGCTTTTAAATGT</u><br>ATACCCAAAGACAA-3' | 843                        | Pst I: CTGCAG<br>Hand III: AAGCTT |
| Small surface protein of HBV (SHBs)  | 5'- <u>GAATTCGAGAA</u><br>CATCGCATCAGGA-3'   | 5'- <u>CTCGAGTTAAATG</u><br>TATACCCAAAGACA-3'  | 679                        | EcoR I :GAATTC<br>Xho I: CTCGAG   |
| X protein of HBV (HBx)               | 5'- <u>CCGCTCGAGATGG</u><br>CTGCTAGGGTGTG-3' | 5'- <u>CGGAATTCCTAGGC</u><br>AGAGGTGAAAAAGT-3' | 465                        | Xho I: CTCGAG<br>EcoR I :GAATTC   |
